# Supplementary material
Source: Royal Society of Chemistry journal article supplement (https://www.rsc.org/suppdata/dt/1998/2981/k802269.doc)
Supplement: Supplementary file 1 [file k802269.doc]

**Supplementary Data**

**Computational Details**

The Molecular Mechanics calculations were performed on a Silicon Graphics Indigo2 workstation using SYBYL software version 6.3 with a modified TRIPOS force field. Natural bite angle calculations were performed using a method similar to that described by Casey and Whiteker (*Isr. J. Chem.*, 1990, **30**, 299-304), with a Ni-P bond length of 2.177 Å and a P-Ni-P bending force constant of 0 kcal / mol deg2.

Additional parameters were developed for the phosphine-type phosphorus atom P.p and the P-O-C bond, which are not defined in the standard TRIPOS force field. These parameters are presented in the following tables.

Minimizations were performed using the standard SYBYL minimizer MAXIMIN and the POWELL method. The structures were allowed to converge fully, with a termination criterion of a rms gradient of less than 0.001 kcal / mol Å.

Bond Lengths

| Atom i | Atom j | Bond type | Bond length (Å) |
| --- | --- | --- | --- |
| C.ar | P.p | 1 | 1.84 |
| Ni | P.p | 1 | 2.177 |
| O.3 | P.p | 1 | 1.70 |

TAFF Bond Stretch

| Atom i | Atom j | Bond type | di,j (Å) | k (kcal / mol) |
| --- | --- | --- | --- | --- |
| C.ar | P.p | 1 | 1.84 | 480 |
| Ni | P.p | 1 | 2.177 | 270 |
| O.3 | P.p | 1 | 1.70 | 800 |

TAFF Angle Bend

| Atom i | Atom j | Atom k | Theta | k (kcal / mol deg2) |
| --- | --- | --- | --- | --- |
| C.ar | P.p | C.ar | 100.0 | 0.02 |
| P.p | Ni | P.p | 109.0 | 0 |
| C.ar | P.p | Ni | 109.5 | 0.02 |
| C.ar | O.3 | P.p | 125.0 | 0.02 |
| O.3 | P.p | Ni | 109.5 | 0.02 |
| O.3 | P.p | O.3 | 100.0 | 0.02 |

TAFF Torsion

| Atom i | Atom j | Atom k | Atom l | k (kcal / mol) |
| --- | --- | --- | --- | --- |
| C.ar | P.p | Ni | P.p | 0.2 |
| C.ar | C.ar | P.p | Ni | 0.2 |
| C.ar | O.3 | P.p | O.3 | 0.4 |
| C.ar | O.3 | P.p | Ni | 0.2 |
| C.ar | C.ar | O.3 | P.p | 0.2 |
| C.ar | C.ar | P.p | C.ar | 0.78 |

TAFF VDW

| Atom | r (Å) | k (kcal / mol) |
| --- | --- | --- |
| P.p | 1.8 | 0.314 |
| Ni | 1.3 | 0.04 |

# Ligand Syntheses

Experimentals for compounds which are not given in the text are part of a different publication (submitted to Organometallics). This different publication deals with the application of these ligands in the hydroformylation reaction. Included you find a copy of the experimental part of the submitted paper. For any inquiries on this please contact Prof. Dr. Piet W. N. M. van Leeuwen, Department of Inorganic Chemistry, University of Amsterdam, Nieuwe Achtergracht 166, 1018 WV Amsterdam, The Netherlands, e-mail: pwnm@anorg.chem.uva.nl

Xantphos type ligands and their use in manyfold catalytic rreactions is patented by DSM: International Application Number PCT/NL95/00161, International Publication Date 16 November 1995, Applicant DSM N.V.; Het Overloon 1, NL-6411 TE Heerlen, Title: Bidentate Phosphine Ligand

# X-ray structures

A CIF file containing all available data of the three structures described in the text is available from the Electronic Supplementary Information service. For any further inquiries on that, please contact Dr. Ulli Englert, Institut für Anorganische Chemie, RWTH Aachen, Templergraben 55, 52056 Aachen, Germany,

e-mail: Ullrich.Englert@ac.rwth-aachen.de

# NMR data

31P{1H}-NMR data of complex **4** has been obtained by mixing [Ni(cod)2] and 1.05 eq of ligand **1a** (Me2N-Thixantphos) in benzene, resulting in the bis-chelate complex [Ni(P^P)2]. Upon adding a 10-fold excess of HCN, the signals for the bis-chelate complex disappeared and one new signal at – 3.7 ppm showed up. We assign this signal to the dicyanao complex **4**. A matching signal was observed by Holah et. al for the dimeric complex [Ni2(CN)2(dppm)2] at 1.4 ppm (*Can. J. Chem.* **1984**, *62*, 1016.).

**Thermodynamic data**

The value for G = 66.3 kJ mol-1, determined from the Gibbs equation G = H ‑ TS, meets nicely with the value calculated from NMR shift values and the Boltzmann equation:

(1)

Equation (1) is based on the assumption that two populations of conformers are given.

The equilibrium constant *k* for the exchange is then defined as:

(2)

For the point of coalescence is

(3)

(4)

(5)

G# = free energy of activation *R* = 8,314 J K-1 mol-1

NA = 6,022  1023 mol-1 ** = resonance frequency in Hz

*h* = 6,626  1024 Js TK = temperature of coalescence

For the bis-chelate complex [Ni(P^P)2] **5d**, (P^P = Thixantphos), the temperature of coalescence is 353 K and G# = 67.6 kJ mol-1.
